# Supplementary material
Source: publisher figshare collection journal article supplement (https://acs.figshare.com/ndownloader/files/21359223)
Supplement: Supplementary file 1 [file 21359223]

Supporting Information

# Manganese-Promoted Fe<sub>3</sub>O<sub>4</sub> Microsphere for Efficient Conversion of CO<sub>2</sub> to Light Olefins

Jiandong Jiang,<sup>1,2,3,8</sup> Chengyan Wen,<sup>4,8</sup> Zhipeng Tian,<sup>1,2,6</sup> Yachen Wang,<sup>5</sup> Yunpu Zhai,<sup>5</sup> Lungang Chen,<sup>1,2,6,7</sup> Yuping Li,<sup>1,2,6,7</sup> Qiying Liu,<sup>1,2,6,7</sup> Chenguang Wang<sup>1,2,6,7,\*</sup> and Longlong Ma<sup>1,2,4,6,7</sup>

<sup>1</sup> Guangzhou Institute of Energy Conversion, Chinese Academy of Sciences, Guangzhou 510640, China

<sup>2</sup> CAS Key Laboratory of Renewable Energy, Guangzhou 510640, China

<sup>3</sup> Nano Science and Technology Institute, University of Science and Technology of China, Suzhou 215123, China

<sup>4</sup> Southeast University, School of Energy and Environment, Nanjing 210009, P. R. China

<sup>5</sup> Research Academy of Environmental Science, College of Chemistry and Molecular Engineering, Zhengzhou University, No.100 Science Rd., Zhengzhou, 450001, Henan, PR China

<sup>6</sup> Guangdong Provincial Key Laboratory of New and Renewable Energy Research and Development, Guangzhou 510640, China

<sup>7</sup> University of Chinese Academy of Sciences, Beijing 100049, PR China

<sup>8</sup> These authors contributed equally

\* Corresponding author: wangcg@ms.giec.ac.cn. (Chenguang Wang)

## **Table of Contents**

**Figure S1.** The profile of N<sub>2</sub> adsorption-desorption isotherms at 77 K.

**Figure S2.** Deconvolution of Mn2p spectrum of reduction 10Mn-Fe<sub>3</sub>O<sub>4</sub> catalyst.

**Table S1.** Physicochemical properties of the Fe<sub>3</sub>O<sub>4</sub> and 10Mn-Fe<sub>3</sub>O<sub>4</sub> catalysts.

## Figures and Tables

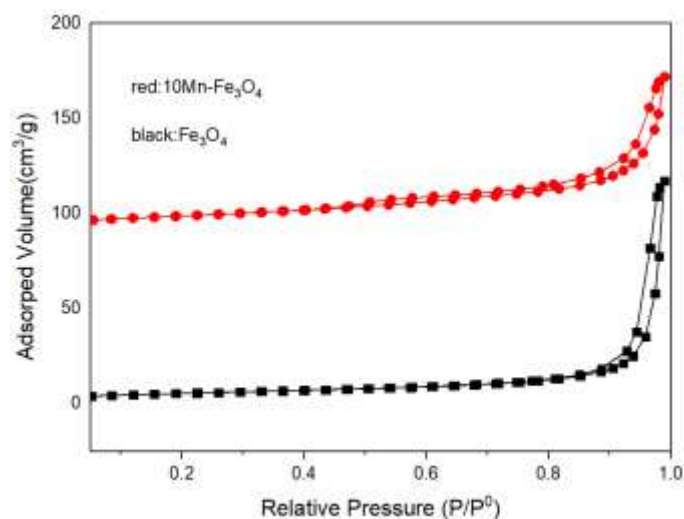

**Figure S1.** N<sub>2</sub> adsorption-desorption isotherms at 77 K

**Table S1.** Physicochemical properties of the Fe<sub>3</sub>O<sub>4</sub> and 10Mn-Fe<sub>3</sub>O<sub>4</sub> catalysts.

| Catalyst                            | BET area (m <sup>2</sup> /g) | Pore volume (cm <sup>3</sup> /g) | Pore size (nm) |
|-------------------------------------|------------------------------|----------------------------------|----------------|
| Fe <sub>3</sub> O <sub>4</sub>      | 12.3                         | 0.07                             | 35             |
| 10Mn-Fe <sub>3</sub> O <sub>4</sub> | 32.9                         | 0.18                             | 36.8           |

N<sub>2</sub> adsorption-desorption isotherms of the pure Fe<sub>3</sub>O<sub>4</sub> and the 10Mn-Fe<sub>3</sub>O<sub>4</sub> are shown in Fig. S1. All samples displayed a type IV isotherm with an H1-type hysteresis loop,<sup>1</sup> which was attributed to the agglomeration of nanoparticles (corresponding the result of Figure 1). The BET area of 10Mn-Fe<sub>3</sub>O<sub>4</sub> (32.9 m<sup>2</sup>/g) was higher than pure Fe<sub>3</sub>O<sub>4</sub> (12.3 m<sup>2</sup>/g), which indicated the manganese promoter is benefited to increase the specific surface area of Fe<sub>3</sub>O<sub>4</sub> microsphere. It implied that Mn-modified Fe<sub>3</sub>O<sub>4</sub> has more active sites than pure Fe<sub>3</sub>O<sub>4</sub>, corresponding to the result of CO<sub>2</sub>-TPD.

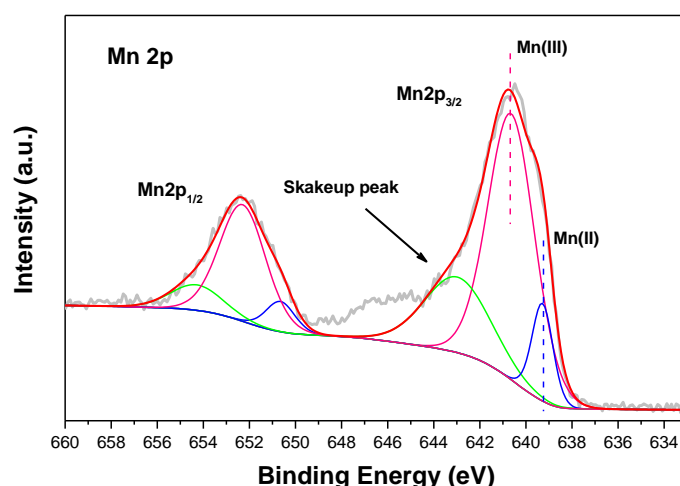

**Figure S2.** Deconvolution of Mn2p spectrum of reduction 10Mn-Fe<sub>3</sub>O<sub>4</sub> catalyst

As Fig. S2 shown, the Mn2p peak of lower binding energy (639.3 eV and 640.8 eV) assigned to Mn(II) and Mn(III) respectively.<sup>2,3</sup> At the same time, the existence of Mn2p satellite feature can also help to identify MnO and Mn<sub>2</sub>O<sub>3</sub>. This indicated the Mn species was a complex oxide rather than Mn metal in the reduced 10Mn-Fe<sub>3</sub>O<sub>4</sub> catalyst.

## REFERENCES:

- 1 Al-Dossary, M.; Ismail, A. A.; Fierro, J. L. G.; Bouzid, H.; Al-Sayari, S. A. Effect of Mn loading onto MnFeO nanocomposites for the CO<sub>2</sub> hydrogenation reaction. *Appl. Catal., B.* **2015**, *165*, 651-660.
- 2 Ilton, E. S.; Post, J. E.; Heaney, P. J.; Ling, F. T.; Kerisit, S. N. XPS determination of Mn oxidation states in Mn (hydr)oxides. *Appl Surf Sci.* **2016**, *366*, 475-485.
- 3 Tian, Z.; Wang, C.; Si, Z.; Ma, L.; Chen, L.; Liu, Q.; Zhang, Q.; Huang, H. Fischer-Tropsch synthesis to light olefins over iron-based catalysts supported on KMnO<sub>4</sub> modified activated carbon by a facile method. *Appl. Catal. A.* **2017**, *541*, 50-59.
